# Supplementary material
Source: bioRxiv or medRxiv preprint supplement (https://www.biorxiv.org/highwire/filestream/32453/field_highwire_adjunct_files/0/098996-1.pdf)
Supplement: Supplementary file [file 098996-1.pdf]

## Supplementary Data

**Table 1:** Questions used to survey the bioinformatics training needs of the SEB and GOBLET communities.

|   | Survey questions                                                                                                                                               |
|---|----------------------------------------------------------------------------------------------------------------------------------------------------------------|
| 1 | What is your position/job title?                                                                                                                               |
| 2 | What is your main research discipline?                                                                                                                         |
| 3 | In which research institute/university/organisation and in which country?                                                                                      |
| 4 | Which bioinformatics databases, software tools, analysis packages and/or interpretation techniques do you currently use in your research and for what purpose? |
| 5 | How confident are you using bioinformatics databases, tools, techniques, <i>etc.</i> ?                                                                         |
| 6 | How have you acquired bioinformatics knowledge/skills (past and present)?                                                                                      |
| 7 | Which bioinformatics skills training would you most value ( <i>e.g.</i> , database selection, software tools, analysing and interpreting data)?                |
| 8 | How would you prefer training to be delivered to you?                                                                                                          |
| 9 | Any other comments you would like to add?                                                                                                                      |

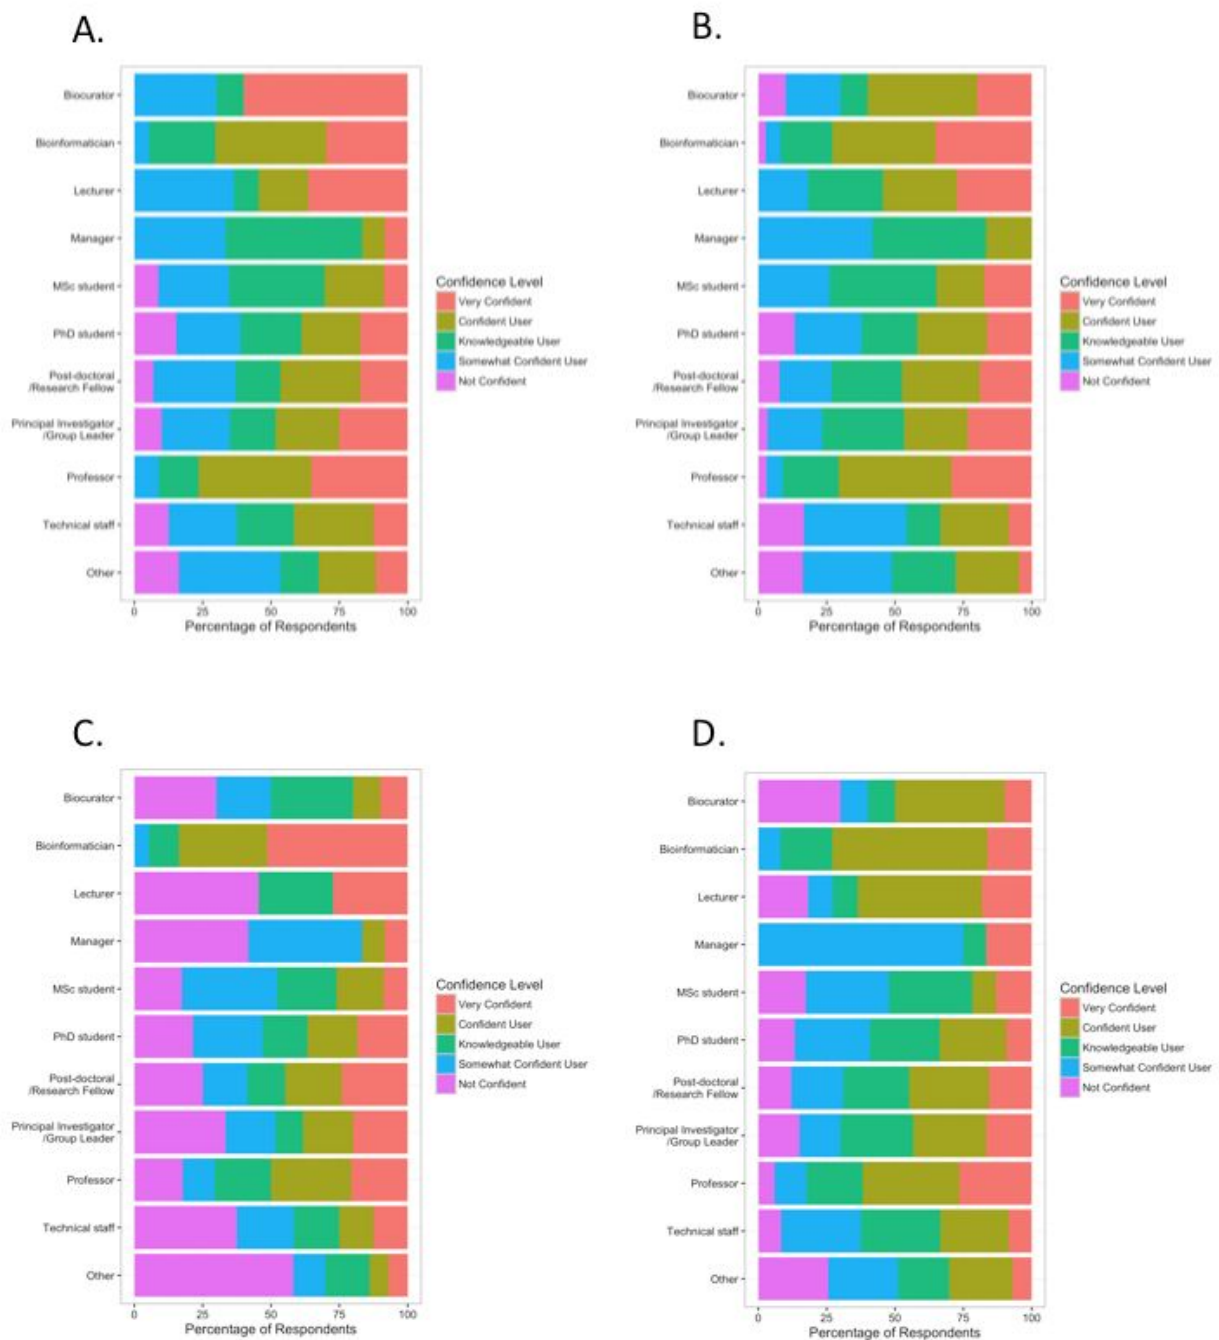

Supplementary Figure 1. Charts comparing the level of confidence of respondents to the GOBLET survey in using bioinformatics databases (A), Web-based software (B), with command-line tools (C) and with data analysis and interpretation (D), on a 5-point scale from 'Not confident' (magenta) to 'Very confident' (red). Intervals on the x-axis denote the percentage of respondents for the given category.
